# Supplementary material for: Atomic-level insights in optimizing reaction paths for hydroformylation reaction over Rh/CoO single-atom catalyst
Source: PubMed Central journal article supplement (PMC5196038; doi:10.1038/ncomms14036), 2016-12-22
Supplement: ncomms14036-s1.pdf [file ncomms14036-s1.pdf]

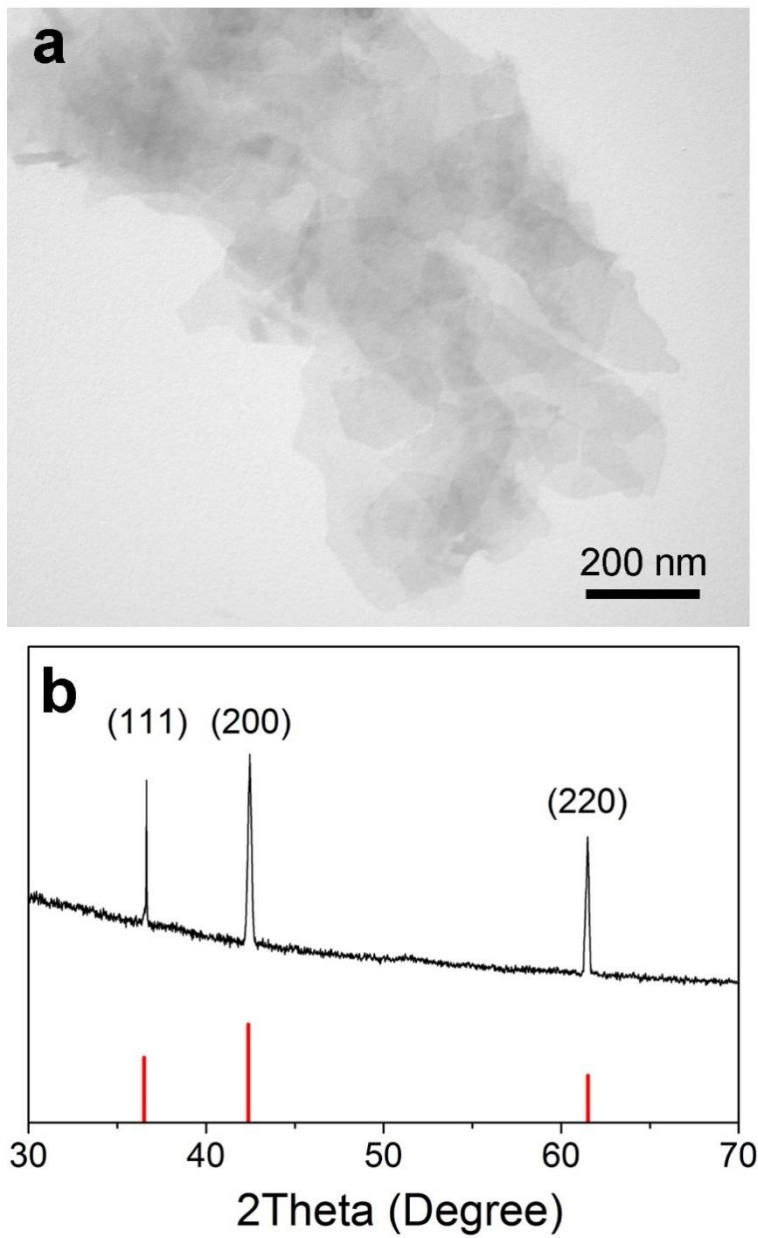

**Supplementary Figure 1.** (a) TEM image and (b) XRD pattern of CoO nanosheets.

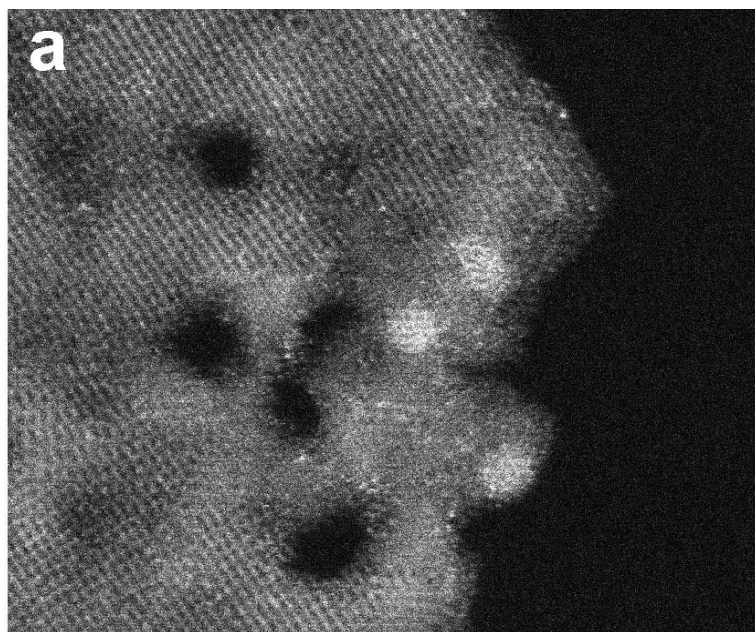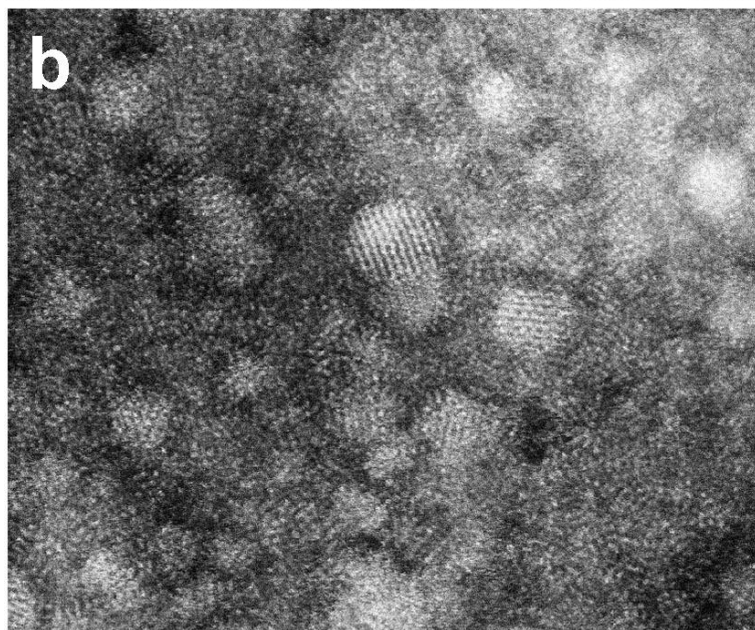

— 5 nm

**Supplementary Figure 2.** HAADF-STEM images of (a) 1.0%Rh/CoO and (b) 4.8%Rh/CoO.

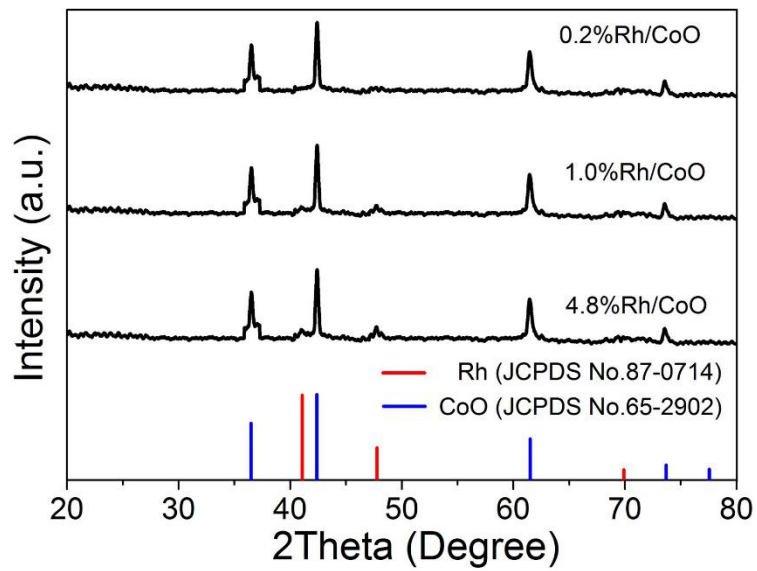

**Supplementary Figure 3.** XRD patterns of 0.2%Rh/CoO, 1.0%Rh/CoO, and 4.8%Rh/CoO.

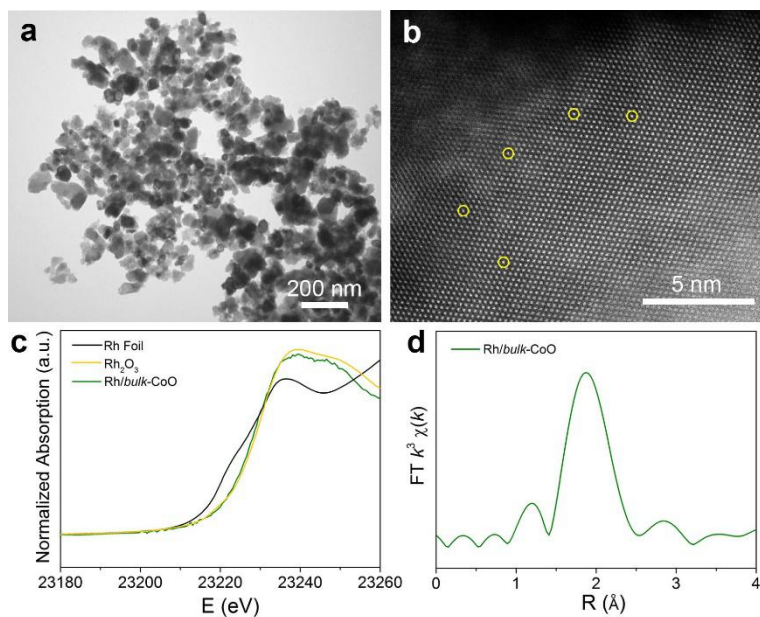

**Supplementary Figure 4.** Structural characterization of Rh/*bulk*-CoO. (a) TEM image of Rh/*bulk*-CoO. (b) HAADF-STEM image of Rh/*bulk*-CoO. Rh single atoms marked in yellow circles are uniformly dispersed on the bulk CoO and occupy exactly the positions of Co atoms. (c) Rh K-edge XANES profiles for Rh/*bulk*-CoO. (d) Rh K-edge EXAFS spectra in *R* space for Rh/*bulk*-CoO.

**Supplementary Table 1.** EXAFS data fitting results of Rh/CoO with different Rh loadings.

| Sample     | Rh-O         |           | Rh-Rh        |           | <i>D. W.</i>                      | $\Delta E_0(\text{eV})$ |
|------------|--------------|-----------|--------------|-----------|-----------------------------------|-------------------------|
|            | <i>R</i> (Å) | <i>CN</i> | <i>R</i> (Å) | <i>CN</i> |                                   |                         |
| Rh foil    | —            | —         | 2.69±0.00    | 12        | 0.004±0.001                       | -6.3±1.1                |
| 0.2%Rh/CoO | 2.04±0.01    | 5.8±0.6   | —            | —         | 0.003±0.001(O)<br>0.005±0.003(Rh) | 0.9±0.8                 |
| 1.0%Rh/CoO | 2.02±0.02    | 4.6±0.8   | 2.70±0.02    | 2.6±0.6   |                                   |                         |
| 4.8%Rh/CoO | 2.02±0.01    | 4.1±0.6   | 2.69±0.01    | 2.5±0.6   |                                   |                         |

*R*, distance between absorber and backscatter atoms; *CN*, coordination number; *D. W.*, Debye-Waller factor;  $\Delta E_0$ , inner potential correction to account for the difference in the inner potential between the sample and the reference compound.

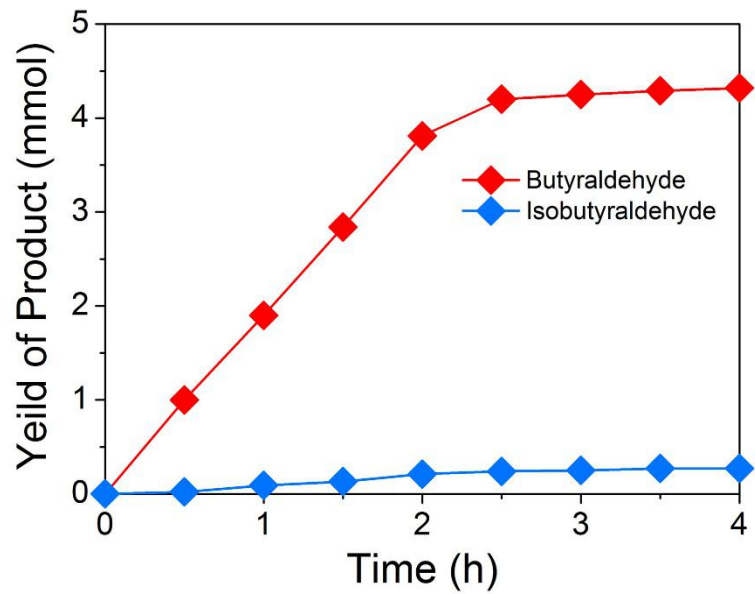

**Supplementary Figure 5.** Time course of the hydroformylation of propene for Rh/*bulk*-CoO.

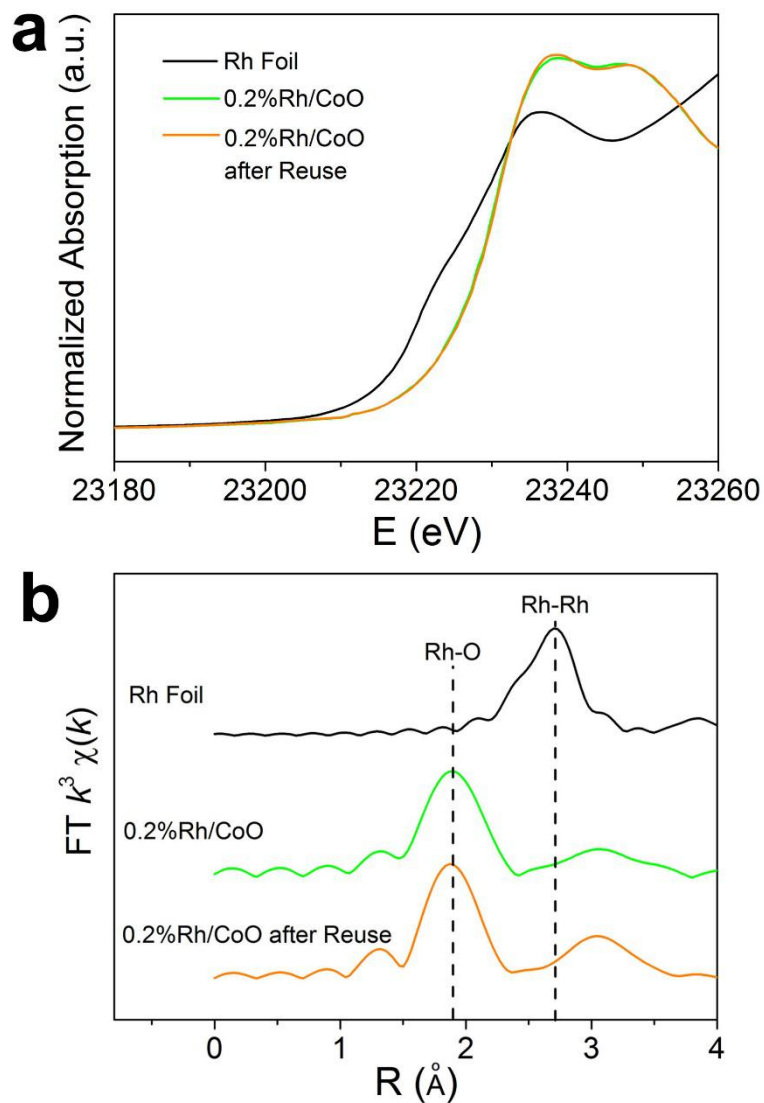

**Supplementary Figure 6.** (a) Rh K-edge XANES profiles for 0.2%Rh/CoO before and after reuse. (b) Rh K-edge EXAFS spectra in  $R$  space for 0.2%Rh/CoO before and after reuse.

**Supplementary Table 2.** CoO balance and residual Rh species of 0.2%Rh/CoO after different rounds of the reaction.

| catalyst                     | CoO balance (%) | Residual metal (%) |
|------------------------------|-----------------|--------------------|
| 0.2%Rh/CoO after one round   | 99.8            | 98.0               |
| 0.2%Rh/CoO after five rounds | 97.2            | 96.1               |



**Supplementary Table 3.** Catalytic performance of 0.2%Rh/CoO in the hydroformylation reactions by using different olefins at 100 °C after 5h.

| Olefins   | Conversion (%) | Selectivity for linear products (%) |
|-----------|----------------|-------------------------------------|
| Ethylene  | 91.2           | 91.6                                |
| Heptylene | 93.5           | 90.5                                |
| Nonylene  | 90.7           | 93.8                                |
| Decene    | 95.8           | 92.4                                |
| Styrene   | 97.2           | 86.4                                |

**Supplementary Table 4.** Adsorption energies of H<sub>2</sub>, CO, and propene on Rh<sub>1</sub>/CoO.

| Adsorbate      | Model                                                    | Adsorption Energy (eV) |
|----------------|----------------------------------------------------------|------------------------|
| H <sub>2</sub> | H <sub>2</sub> on Rh <sub>1</sub> /CoO                   | -0.02                  |
| CO             | CO on Rh <sub>1</sub> /CoO                               | -1.41                  |
| Propene        | Propene on Rh <sub>1</sub> /CoO                          | -0.46                  |
| 2H             | OH on Rh <sub>1</sub> /CoO                               | -1.73                  |
| Propene        | H <sub>2</sub> , CO, and propene on Rh <sub>1</sub> /CoO | -0.80                  |

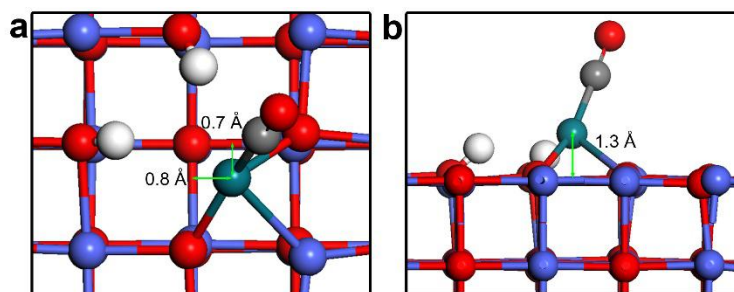

**Supplementary Figure 7.** (a) Top view of the co-adsorbed configuration of both H<sub>2</sub> and CO on Rh<sub>1</sub>/CoO, showing the in-plane displacement of the Rh single atom. The Rh single atom deviated from the lattice point by ca. 1.1 Å towards the center of the unit cell. (b) Side view of the co-adsorbed configuration of both H<sub>2</sub> and CO on Rh<sub>1</sub>/CoO, showing the out-of-plane displacement of the Rh single atom. The Rh single atom moved ca. 1.3 Å out of the plane.

**Supplementary Table 5.** The reaction enthalpy ( $\Delta H$ , eV) and activation energy ( $E_a$ , eV) of each elementary step.

| Derived Configuration | Step i           |             | Step ii          |             | Step iii         |             |
|-----------------------|------------------|-------------|------------------|-------------|------------------|-------------|
|                       | $\Delta H_{l-1}$ | $E_{a,l-1}$ | $\Delta H_{l-2}$ | $E_{a,l-2}$ | $\Delta H_{l-3}$ | $E_{a,l-3}$ |
| Configuration I       | 0.378            | 1.160       | 0.234            | 1.032       | 0.688            | 1.233       |
|                       |                  |             |                  |             |                  |             |
| Configuration II      | $\Delta H_{b-1}$ | $E_{a,b-1}$ | $\Delta H_{b-2}$ | $E_{a,b-1}$ | $\Delta H_{b-3}$ | $E_{a,b-3}$ |
|                       | 0.395            | 1.100       | 0.25             | 1.206       | 0.729            | 1.296       |
